# Supplementary material for: The osteoporosis diagnosis and treatment gaps among Iranian women
Source: Research Square preprint supplement (doi:10.21203/rs.3.rs-7132068/v1), 2025-08-07
Supplement: Supplementary file 1 [file 38e114d1d5cb40aa282f80ea.docx]

| **Table S5.** Selected patient characteristics by adherence level. (n=44) | | | | |
| --- | --- | --- | --- | --- |
|  | **Adherence level** | | | |
| **Characteristics** | **OS-MMAS-8 low**  **adherence (n =9)** | **OS-MMAS-8 medium**  **adherence (n =35)** | **OS-MMAS-8 high**  **adherence (n =0)** | **P-value** |
| Age, years* | 71.5±4.65 | 72.06±7.83 | - | 0.833 |
| BMI, kg/m2* | 26.59±5.20 | 27.28±4.00 | - | 0.654 |
| 10-year probability of hip fracture** | 6.6(3.1,13.3) | 4.2(3.1,7.0) | - | 0.436 |
| 10-year probability of major osteoporotic fracture** | 15(8.2,15.0) | 11(8.6,11.0) | - | 0.548 |
| Residence, n (%)  Urban  Rural | 8(88.9)  1(11.1) | 25(71.4)  10(28.6) | - | 0.411 |
| Marital status, n (%)  Married  Not married | 4(40)  5(60) | 21(60)  14(40) | - | 0.720 |
| Education, n (%)  Illiterate  Elementary | 4(40)  5(60) | 20(57.1)  15(42.9) | - | 0.476 |
| Insurance status, n (%)  No insurance  Basic insurance  Basic and supplementary insurance | -  7(77.8)  2(22.2) | 4(11.4)  19(54.3)  12(34.3) | - | 0.536 |
| Overweight, n (%) | 4(40) | 15(42) | - | 0.242 |
| Obese, n (%) | 3(30) | 8(22.9) | - | 0.242 |
| Current Smokers, n (%) | 1(10) | 4(11.4) | - | 0.899 |
| Parental hip fracture, n (%) | - | 5(14.3) | - | 0.571 |
| Glucocorticoids intake, n (%) | 3(30) | 11(31.4) | - | 0.931 |
| Previous Fracture, n (%) | 5(50) | 8(22.9) | - | 0.095 |
| Rheumatoid arthritis, n (%) | 4(40) | 8(22.9) | - | 0.418 |
| Secondary osteoporosis, n (%) | - | 9(25.7) | - | 0.173 |
| Awareness of OP and its complications | 6(66.7) | 27(77.1) | - | 0.669 |

*Mean± SD

**Median (Q1, Q3)

| **Table S6.**  History of osteoporosis medication in patients who have Initiated to the treatment. (n=98) | | |
| --- | --- | --- |
| **Drugs** | **Does not consume at all** | **Used to consume, but now doesn't consume** |
| **Oral medication**  Bisphosphonates  Alendronate | 34(34.7) | 34(34.7) |
| Risedronate  Raloxifene | 58(59.2)  93(94.9) | 21(21.4)  4(4.1) |
| **Intravenous medication**  Bisphosphonates  Zoledronic acid | 79(80.6) | 11(11.2) |
| Teriparatide | 93(94.9) | 5(5.1) |
| Calcitonin | 91(92.9) | 5(5.1) |
| Estrogen | 92(93.87) | 1(1) |
| **Complementary medication**  Vitamin D | 2(2) | 3(3.1) |
| Calcium | 16(16.3) | 12(12.2) |
| **Others** | 83(84.7) | 13(13.3) |

**Fig S3.** Status of osteoporosis medication use in in patients who have initiated to the treatment
